# Supplementary material for: Eye Drop with Fas-Blocking Peptide Attenuates Age-Related Macular Degeneration
Source: MDPI journal article supplement (doi:10.3390/cells13060548), 2024-03-20
Supplement: s1 [file s1]

## Supplementary Materials

### Eye Drop with Fas-Blocking Peptide Attenuates Age-Related Macular Degeneration

Yujong Yi <sup>1,†</sup>, Seon-Hong Pyun <sup>1,†</sup>, Chae-Yeon Kim <sup>1</sup>, Gyeongju Yun <sup>1</sup>, Eunhwa Kang <sup>1</sup>, Seoyoun Heo <sup>1</sup>, Irfan Ullah <sup>2,\*</sup> and Sang-Kyung Lee <sup>1,\*</sup>

#### Total Supplementary Figures (S1~S4)

Figure S1. Peptide toxicity test by CCK-8 assay in ARPE-19 cells.

Figure S2. Concentration-dependent cell viability in NaIO<sub>3</sub>-induced ARPE-19 cells.

Figure S3. Cell-Penetrating Peptide (CPP) toxicity test by CCK-8 assay in ARPE-19 cells.

Figure S4. Size-dependent FBP binding test in Jurkat cells.

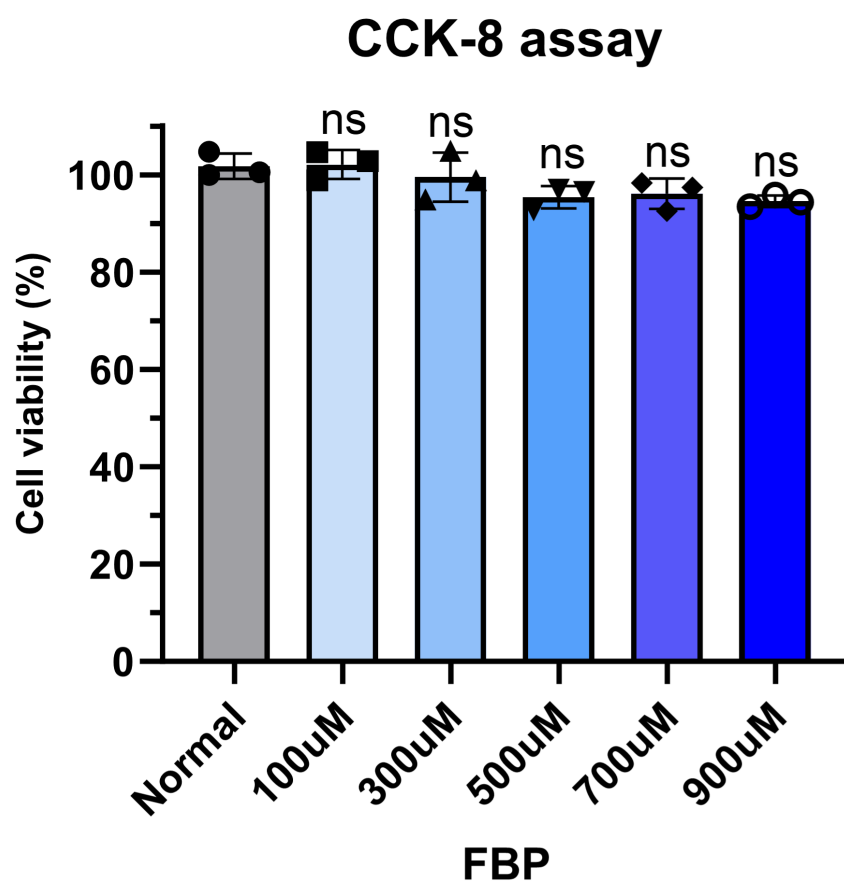

**Figure S1. Peptide toxicity test by CCK-8 assay in ARPE-19 cells.** Peptide toxicity was assessed using CCK-8 assay in ARPE-19 cell. The data are presented as the mean  $\pm$  SD (N=3 per group). ns indicates not significant.

## CCK-8 assay

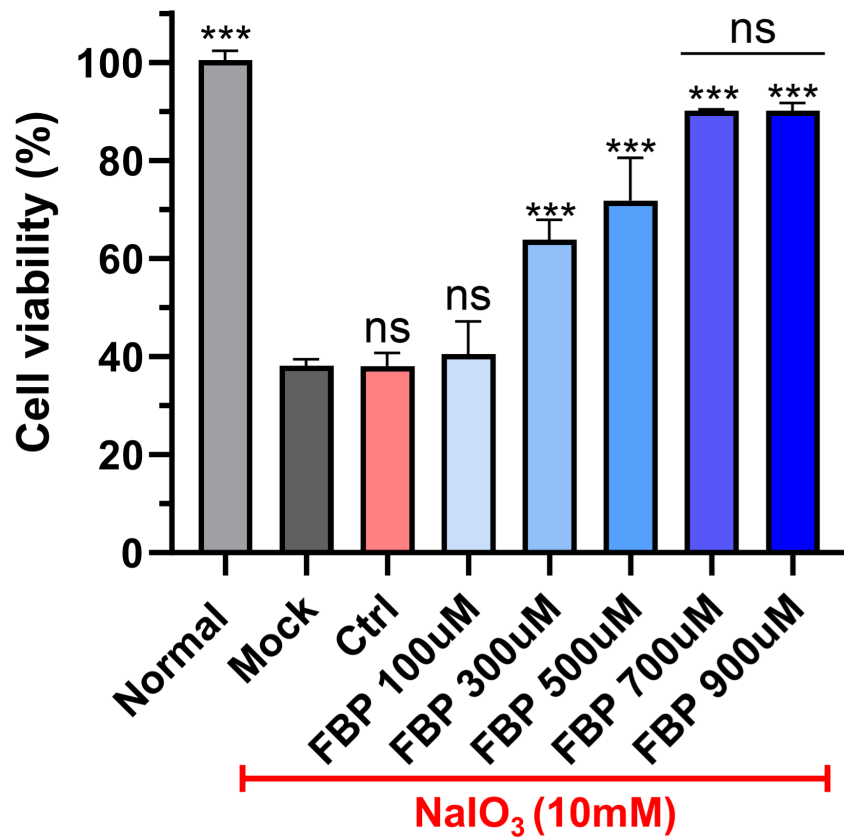

**Figure S2. Concentration-dependent cell viability in NaIO<sub>3</sub>-induced ARPE-19 cells.** Cell viability under concentration-dependent conditions was evaluated in NaIO<sub>3</sub>-induced ARPE-19 cells. The data are presented as the mean  $\pm$  SD from three independent experiments. \*\*\*P<0.001, and ns indicates not significant.

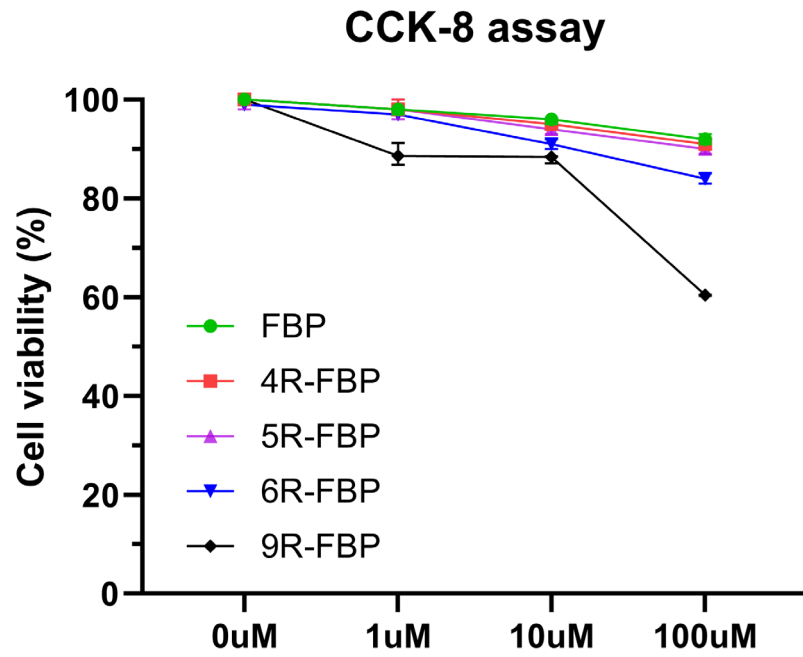

**Figure S3. Cell-penetrating peptide (CPP) toxicity test by CCK-8 assay in ARPE-19 cell.** CPP toxicity was assessed using the CCK-8 assay in ARPE-19 cell. The data are presented as the mean  $\pm$  SD (N=3 per group).

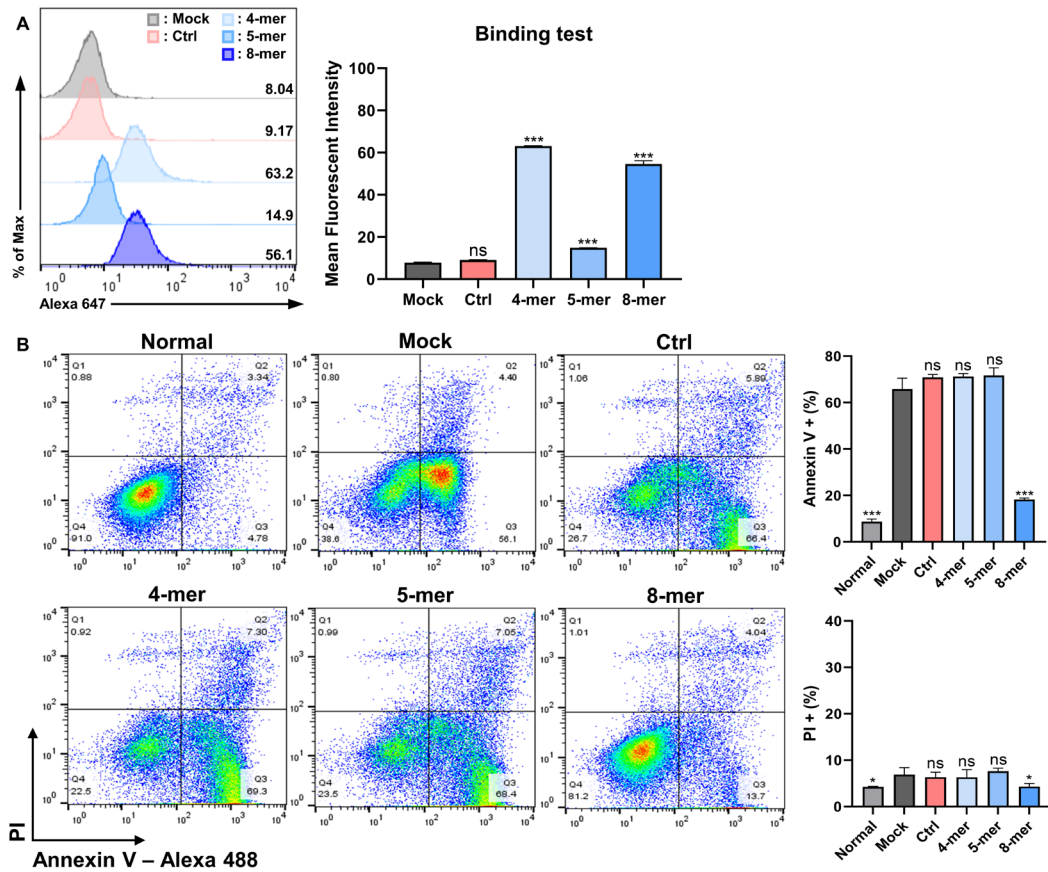

**Figure S4. Size-dependent FBP binding test in Jurkat cells.** (A) Size-dependent FBP flow cytometry analysis of binding in Jurkat cells. (B) Size-dependent FBP flow cytometry analysis of apoptosis in Jurkat cells. The data are presented as the mean  $\pm$  SD (N=3 per group). \* $P < 0.05$ , \*\*\* $P < 0.001$ , and ns indicates not significant.
